# Supplementary figures and images for: Landscape of Immune Microenvironment in Epithelial Ovarian Cancer and Establishing Risk Model by Machine Learning
Source: Hindawi journal article supplement (doi:10.1155/2021/5523749), 2021-08-26

## Supplementary figure 2

**GSE 32062**

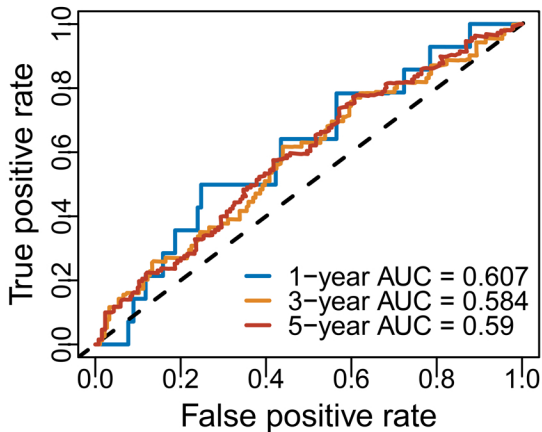

**GSE63885**

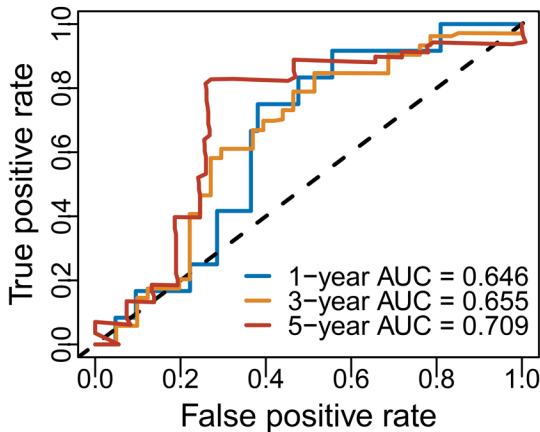

Supplement: f1 [file 5523749.f1.zip]

Supplementary figure 3

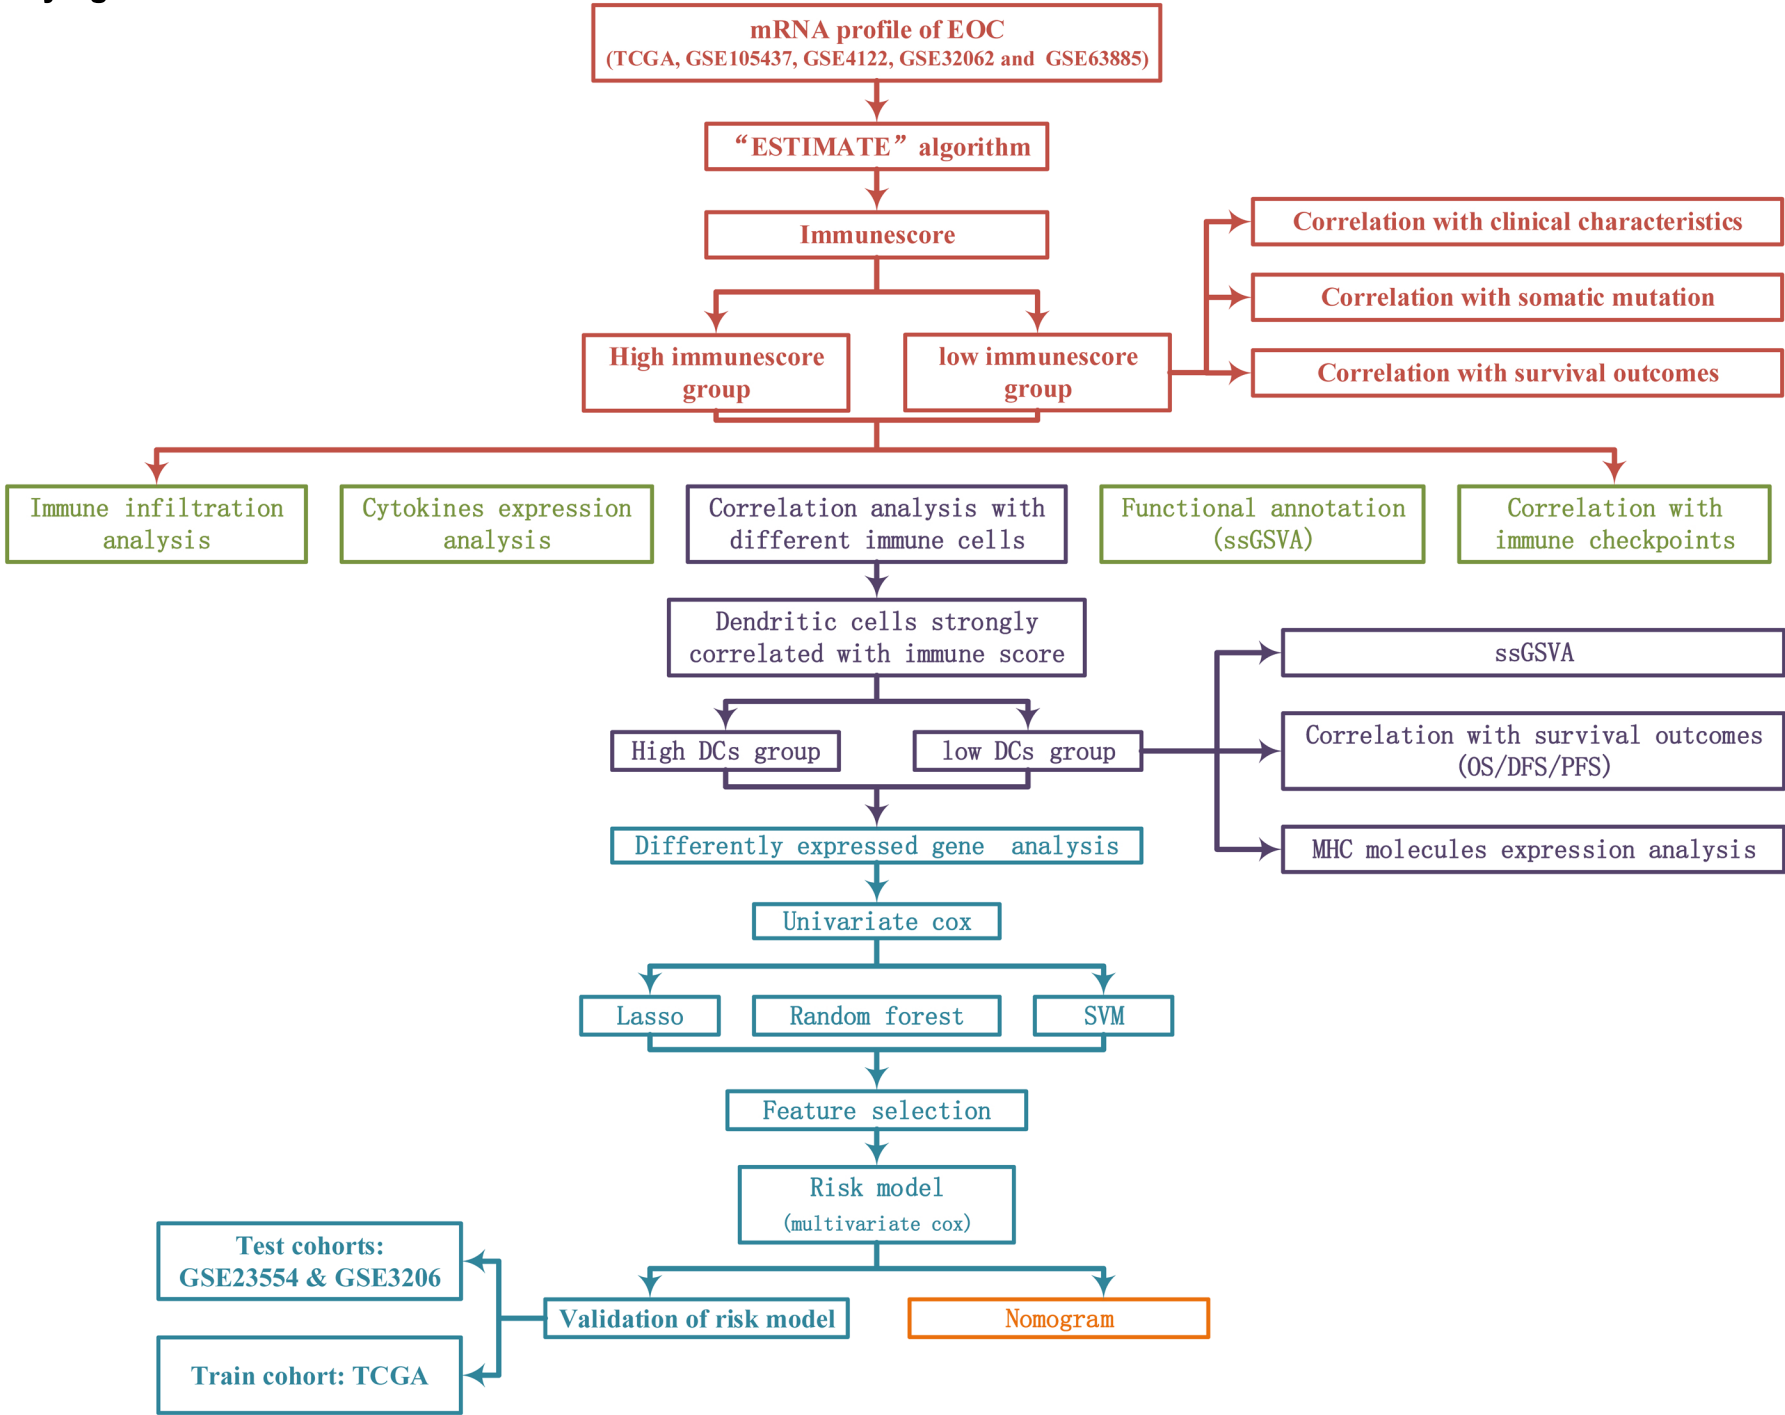

Supplement: f1 [file 5523749.f1.zip]

# Supplementary figure 1

## BRCA1/2(ns)

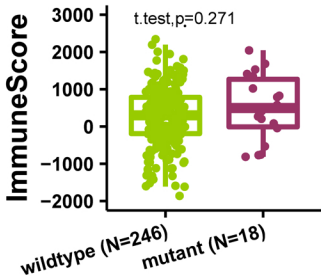

Supplement: f1 [file 5523749.f1.zip]
